# Supplementary material
Source: HighWire-hosted journal article supplement (https://srh.bmj.com/content/bmjsrh-2020-200932)
Supplement: inline-supplementary-material-1 [file inline-supplementary-material-1.pdf]

**Table S1. Intention-to-treat analysis of abortion-related variables for medical abortion at 17-20 weeks gestation.**

|                                                                             | <b>Immediate Group (n=55)</b> | <b>Delayed Group (n=57)</b> |                      |
|-----------------------------------------------------------------------------|-------------------------------|-----------------------------|----------------------|
| Abortion intervals                                                          | Median (IQR)                  | Median (IQR)                | P-value <sup>a</sup> |
| Time to fetal expulsion (Hours)                                             | 6.3 (4.8-9.6)                 | 8.3 (6.0-11.0)              | 0.15                 |
| Time from fetal expulsion to abortion completion <sup>b</sup> (Hours)       | 5.2 (2.9-6.4)                 | 4.3 (1.5-6.5)               | 0.34                 |
|                                                                             | n (%)                         | n (%)                       |                      |
| Spontaneous expulsion of fetus                                              | 55 (100)                      | 57 (100)                    | -                    |
| Additional procedures following fetal expulsion                             |                               |                             | 0.34                 |
| None (spontaneous complete expulsion of placenta)                           | 29 (53)                       | 23 (40)                     |                      |
| Manual removal of retained placenta (no vacuum aspiration performed)        | 6 (11)                        | 6 (11)                      |                      |
| Vacuum aspiration for retained placenta, products of conception or bleeding | 20 (36)                       | 28 (49)                     |                      |
| IUD inserted after vacuum aspiration <sup>c</sup>                           | 15 (33)                       | -                           |                      |
| Abortion complications                                                      |                               |                             |                      |
| Given intravenous antibiotics for infection                                 | 2 (4)                         | 0 (0)                       | 0.24                 |
| Hemorrhage >500 ml                                                          | 8 (15)                        | 5 (9)                       | 0.34                 |

<sup>a</sup> Wilcoxon rank-sum tests for medians. Chi-squared or Fisher's exact test for proportions

<sup>b</sup> Defined as expulsion or evacuation of the placenta

<sup>c</sup> Includes only those getting the IUD immediately (per protocol)
