# Supplementary material
Source: HighWire-hosted journal article supplement (https://srh.bmj.com/content/bmjsrh-2020-200932)
Supplement: inline-supplementary-material-2 [file inline-supplementary-material-2.pdf]

**Table S2. Non-randomised, observational comparison of experiences of women who received an IUD by 6 weeks, either immediate or delayed insertion after medical abortion at 17-20 weeks gestation.**

|                                               | Immediate insertion<br>n=45 | Delayed insertion<br>n=25 | p-value <sup>a</sup> |
|-----------------------------------------------|-----------------------------|---------------------------|----------------------|
| <b>IUD-related complications</b>              |                             |                           |                      |
| Signs of localized infection                  |                             |                           |                      |
| <i>At 6 weeks (n)<sup>b</sup></i>             | n=37                        | n=11                      |                      |
| Yes                                           | 4 (11)                      | 2 (18)                    | 0.42                 |
| Cramping over the last 6 weeks                |                             |                           |                      |
| <i>At 3 months (n)</i>                        | n=34                        | n=21                      | 0.56                 |
| None / Mild                                   | 31 (91)                     | 19 (90)                   |                      |
| Moderate                                      | 3 (9)                       | 1 (5)                     |                      |
| High                                          | 0 (0)                       | 1 (5)                     |                      |
| <b>Satisfaction</b>                           | n (%)                       | n (%)                     |                      |
| <i>At 6 weeks (n)<sup>b</sup></i>             | n=37                        | n=9                       | 0.64                 |
| Very satisfied                                | 35 (95)                     | 9 (100)                   |                      |
| Somewhat satisfied                            | 2 (5)                       | 0 (0.0)                   |                      |
| Somewhat / very dissatisfied                  | 0 (0)                       | 0 (0.0)                   |                      |
| <i>At 3 months (n)</i>                        | n=34                        | n=22                      | 0.15                 |
| Very satisfied                                | 30 (88)                     | 22 (100)                  |                      |
| Somewhat satisfied                            | 4 (12)                      | 0 (0.0)                   |                      |
| Somewhat / very dissatisfied                  | 0 (0.0)                     | 0 (0.0)                   |                      |
| <i>At 6 months (n)</i>                        | n=26                        | n=16                      | 0.28                 |
| Very satisfied                                | 23 (89)                     | 16 (100)                  |                      |
| Somewhat satisfied                            | 3 (12)                      | 0 (0)                     |                      |
| Somewhat / very dissatisfied                  | 0 (0)                       | 0 (0)                     |                      |
| <b>Would recommend to a friend having TOP</b> |                             |                           |                      |
| <i>At 3 months (n)</i>                        | n=36                        | n=22                      | ~1.00                |
| Highly agree                                  | 35 (97)                     | 22 (100)                  |                      |
| Somewhat agree                                | 0 (0)                       | 0 (0)                     |                      |
| Somewhat / highly disagree                    | 1 (3)                       | 0 (0)                     |                      |

<sup>a</sup> Chi-squared or Fisher's exact test for proportions

<sup>b</sup> Excludes participants getting the IUD for the first time at 6 weeks but includes participants that had IUD replaced at 6 weeks
